# Competition, collaboration and coordination – determining how cells bypass DNA damage

Julian E. Sale

Medical Research Council Laboratory of Molecular Biology, Hills Road, Cambridge CB2 0QH, UK

jes@mrc-lmb.cam.ac.uk

*Journal of Cell Science* 125, 1633–1643  
© 2012. Published by The Company of Biologists Ltd  
doi: 10.1242/jcs.094748

## Summary

Cells must overcome replication blocks that might otherwise lead to genomic instability or cell death. Classical genetic experiments have identified a series of mechanisms that cells use to replicate damaged DNA: translesion synthesis, template switching and homologous recombination. In translesion synthesis, DNA lesions are replicated directly by specialised DNA polymerases, a potentially error-prone approach. Template switching and homologous recombination use an alternative undamaged template to allow the replicative polymerases to bypass DNA lesions and, hence, are generally error free. Classically, these pathways have been viewed as alternatives, competing to ensure replication of damaged DNA templates is completed. However, this view of a series of static pathways has been blurred by recent work using a combination of genetic approaches and methodology for examining the physical intermediates of bypass reactions. These studies have revealed a much more dynamic interaction between the pathways than was initially appreciated. In this Commentary, I argue that it might be more helpful to start thinking of lesion-bypass mechanisms in terms of a series of dynamically assembled ‘modules’, often comprising factors from different classical pathways, whose deployment is crucially dependent on the context in which the bypass event takes place.

**Key words:** DNA damage tolerance, Translesion synthesis, Homologous recombination, Mutagenesis

## Introduction

Genome duplication is carried out by a finely tuned molecular machine that works with astonishing rapidity and accuracy. However, the polymerases at its core are geared to operate on a pristine DNA template, a situation that is rarely found for long in practice. DNA is continuously damaged by insults from both endogenous and exogenous sources, leading to base lesions that block the replicative polymerases. Despite the existence of highly efficient repair mechanisms, damaged bases are still inevitably encountered during replication, which can result in replication fork arrest (reviewed by Branzei and Foiani, 2010). Attempting excision repair of the lesion at this point is risky because, by the time the polymerase has stalled, the lesion is present in single-stranded DNA, the duplex having been unwound by the replicative helicase. Thus, an excision step would result in the formation of a double-strand break (DSB) and collapse of the replication fork, a potentially much more dangerous situation that creates a potent substrate for undesirable genomic rearrangements. Although it has been suggested that some bacteria, notably *Escherichia coli*, can reverse the replication fork to bring the lesion back into double-stranded DNA for safe excision (Courcelle et al., 2003; McGlynn and Lloyd, 2000), there is not a great deal of evidence that this approach is conserved in eukaryotes. Instead, an important strategy for dealing with polymerase-stalling lesions, which is found in all branches of life, is to use specialised mechanisms to replicate the lesion before attempting excision repair: these are collectively known as DNA damage tolerance mechanisms (reviewed by Branzei and Foiani, 2010; Sale et al., 2012) and are also sometimes referred to as post-replication repair (because the replication of damaged DNA was originally associated with the filling of gaps

left after bulk replication had been completed, although it is important to note that the word ‘repair’ in this context refers to the gaps, not the lesions).

DNA damage tolerance can proceed through one of two broad mechanisms (Fig. 1A). In the first, termed translesion synthesis (TLS), the stalled replicative polymerases are replaced by specialised TLS DNA polymerases (Table 1) that are able to replicate directly across the lesion (Sale et al., 2012). They are able to do this because their active sites have a larger volume than those of the replicative polymerases and are therefore more able to accommodate damaged or distorted templates (reviewed in Yang, 2003). The trade off for this facility is an increased risk of mutagenesis. TLS is mutagenic for two reasons. First, damaged bases are often miscoded, for example 8-oxoguanine can pair with deoxyadenosine (dA) (Friedberg et al., 2006). Second, TLS polymerases have an intrinsically lower fidelity owing to their lower ability to discriminate the correct base (Beard et al., 2002) and their lack of exonuclease proofreading activity (Sale et al., 2012). In the second general mechanism, the stalled polymerase makes use of an alternative, undamaged template (Branzei, 2011). Most frequently this is the newly synthesised daughter strand on the sister chromatid. This so-called ‘template switching’ mechanism is, therefore, in contrast to TLS, accurate. Many aspects of its proposed molecular mechanism closely resemble classical homologous recombination, but, as discussed below, the two can be distinguished genetically. Failure of DNA damage tolerance mechanisms frequently results in formation of DSBs owing to collapse of the replication fork, and in this situation homologous recombination is needed to reinitiate replication (Fig. 1A).

There are a number of excellent recent reviews on the mechanisms of DNA damage tolerance (e.g. Branzei, 2011; Ulrich, 2009; Sale et al., 2012) so in this Commentary, I first begin with an overview of the classical pathways of lesion bypass, before focusing on the interactions between these under the three headings ‘Competition’, ‘Collaboration’ and ‘Coordination’. In Competition, I explore the classical model and its limitations; in Collaboration, I consider recent evidence that reveals significant fluidity between the boundaries of the classical pathways. I suggest that this moves us towards a more context-specific way of thinking about the mechanisms by which simple DNA lesions are bypassed. Finally, in Coordination, I discuss how replication of complex DNA lesions and clusters of DNA damage require the regulated deployment of a series of mechanisms.

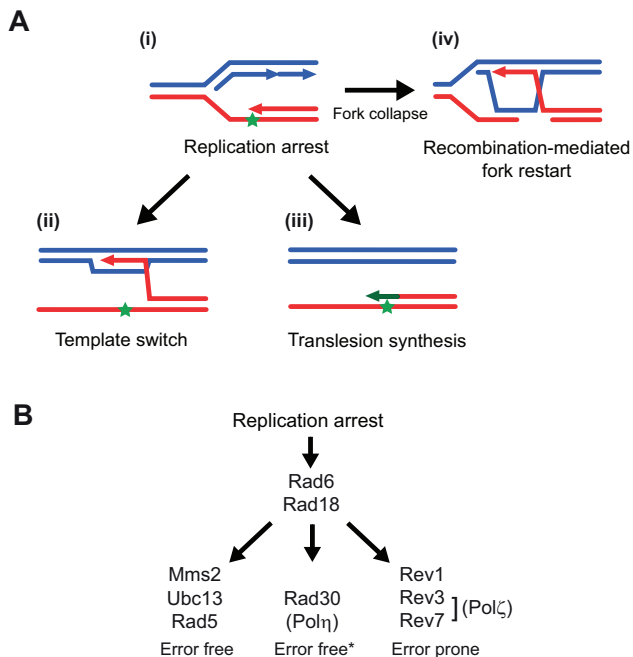

**Fig. 1. Competition between pathways in the Rad6 DNA damage tolerance epistasis group.** (A) A simplified representation of the mechanisms of TLS and template switching. Following replication fork arrest at a DNA lesion (green star) (i) the lesion can be replicated using an alternative DNA template, most commonly the newly synthesised daughter strand on the sister chromatid (ii), or specialised DNA polymerases can directly replicate the lesion by TLS (iii). If the template strand is incised the fork will collapse and this will require recombination to re-establish the fork (iv). Note (ii) illustrates just one of the possible models of template switching (also see the main text and Fig. 3). (B) The classical view of the core of the Rad6 pathway of DNA damage tolerance in *S. cerevisiae*. The pathway depends on the actions of Rad6 and Rad18, which are epistatic to components of the ‘error prone’ and ‘error free’ modes of bypass. For simplicity, the scheme does not include the alleles of pol $\delta$  (Torres-Ramos et al., 1997) and PCNA [pol30-46, (Torres-Ramos et al., 1996)] that first suggested that these genes were involved in damage tolerance, nor the antirecombinogenic helicase Srs2 (also see the main text and Table 1). Although often used in the early literature the terms ‘error prone’ and ‘error free’ pathways are not always informative. Rad30 (also known as pol $\eta$ ) is apparently required for an error-free pathway (denoted ‘error free\*’ in the figure). However, this principally applies to the replication of cyclobutane pyrimidine dimers, the common UV lesion, which mechanistically it does by TLS.

## The core pathways of lesion bypass in eukaryotes

Much of our understanding of the molecular mechanisms of damage tolerance comes from genetic studies in the budding yeast *Saccharomyces cerevisiae*. Here, the majority of DNA damage tolerance is accounted for by genes of the RAD6 epistasis group (Table 1). In essence, the RAD6 group genes act in two subpathways (Fig. 1B), both of which require the action of Rad6 and of a second protein Rad18 (Bailly et al., 1994; Prakash, 1981). The first pathway contains the translesion DNA polymerases, Rev1, Pol $\zeta$  (comprising the Rev3 catalytic subunit and the smaller, possibly regulatory, subunit Rev7) and Pol $\eta$  (Rad30). The second pathway accounts for the error-free ‘template switch’ mode of bypass and comprises Rad5, Ubc13 and Mms2 (reviewed by Broomfield et al., 2001; Lehmann, 2000). Early studies also obtained evidence for the involvement of the core replication machinery in the form of proliferating cell nuclear antigen (PCNA; the sliding clamp that tethers replication and repair proteins to the DNA) (Torres-Ramos et al., 1996) and the replicative DNA polymerase, pol $\delta$  (Torres-Ramos et al., 1997). In addition, Rad52, the eponymous founder of the homologous recombination epistasis group, can also mediate some post-replication repair (Prakash, 1981). However, for many years the molecular mechanism underlying the Rad6 group remained a significant puzzle because, with the exception of the TLS polymerases, the core factors are involved in protein ubiquitylation (Box 1) (Bailly et al., 1997; Hofmann and Pickart, 1999; Jentsch et al., 1987; Ulrich and Jentsch, 2000).

In 2002, a groundbreaking study brought together these apparently diverse functions of the Rad6 group by showing that the key target of the ubiquitylation activity of the pathway is PCNA (Pol30 in yeast) (Hoegge et al., 2002). That work, together with many subsequent studies, led to a working model for the Rad6 group. The formation of single-stranded DNA, which at sites of stalled replication is coated with the single-strand-binding protein replication protein A (RPA), leads to the recruitment of the E3 ubiquitin ligase Rad18, which, acting in concert with Rad6 (an E2 ubiquitin conjugating enzyme), monoubiquitylates lysine (K) 164 of PCNA (Fig. 2) (Davies et al., 2008; Haracska et al., 2004; Hoegge et al., 2002; Stelter and Ulrich, 2003). The monoubiquitin installed by Rad6 and Rad18 then stimulates TLS by promoting the association of the specialised TLS DNA polymerases with PCNA through the interaction between ubiquitin and the ubiquitin-binding domains, which are located within their C-terminal regions (Bienko et al., 2005). Thus, the ubiquitylation of PCNA couples the persistent exposure of single-stranded DNA that follows replication fork arrest to lesion bypass, thereby ensuring that the potentially damaging activities of the TLS polymerases are only deployed at distressed forks.

The ubiquitin moiety at K164 of PCNA can be extended with a K63-linked ubiquitin chain by the E3 ligase Rad5, which acts together with the E2 enzyme Ubc13 and E2-like protein Mms2 (Hoegge et al., 2002; Hofmann and Pickart, 1999; Ulrich and Jentsch, 2000). Although such polyubiquitylation of PCNA has been genetically linked to ‘template switching’ (Hoegge et al., 2002), the exact function of these chains in promoting strand exchange remains a key unanswered question. Rad5 also possesses an ATPase activity that is necessary for its role in damage tolerance (Gangavarapu et al., 2006) and which is linked to its helicase activity, which in vitro can promote reversal of fork-like structures (Blastyak et al., 2007).

**Table 1. The Rad6 epistasis group**

| <i>S. cerevisiae</i> | <i>H. sapiens</i> | Function                                                                                                                                                                                                                                                                                                                                                                                                                                                                         |
|----------------------|-------------------|----------------------------------------------------------------------------------------------------------------------------------------------------------------------------------------------------------------------------------------------------------------------------------------------------------------------------------------------------------------------------------------------------------------------------------------------------------------------------------|
| Rad6                 | RAD6A, RAD6B      | E2 ubiquitin conjugating enzyme (Jentsch et al., 1987); works with the E3 ubiquitin ligase Rad18 in DNA damage tolerance (Bailly et al., 1994)                                                                                                                                                                                                                                                                                                                                   |
| Rad18                | RAD18             | Main E3 for PCNA monoubiquitylation (Hoege et al., 2002); works with Rad6; human protein also binds pol $\eta$ (Watanabe et al., 2004)                                                                                                                                                                                                                                                                                                                                           |
| Ubc13                | UBC13             | E2 ubiquitin conjugating enzyme; involved in a number of other processes in the cell, notably the double strand break response where it works with the E3 Rnf8 (Huen et al., 2007)                                                                                                                                                                                                                                                                                               |
| Mms2                 | UBE2V2            | E2-like protein; binds to Ubc13 and restricts chain formation to K63 linkage but has no catalytic activity of its own (Hofmann and Pickart, 1999)                                                                                                                                                                                                                                                                                                                                |
| Rad5                 | SHPRH, HLTF       | E3 for PCNA polyubiquitination (Hoege et al., 2002); RAD5 also has ATP-dependent helicase activity (Blastyak et al., 2007). HLTF can monoubiquitinate PCNA (Lin et al., 2011)                                                                                                                                                                                                                                                                                                    |
| Rev1                 | REV1              | Y-family polymerase; deoxycytidyl transferase (Nelson et al., 1996a); has a key role in coordinating TLS as its C-terminus interacts with PCNA and the other TLS polymerases (Guo et al., 2003; Ross et al., 2005)                                                                                                                                                                                                                                                               |
| Rev3                 | REV3              | Forms a complex with Rev7 to create the B-family polymerase, pol $\zeta$ with Rev3 being the catalytic subunit (Nelson et al., 1996b); has a key role in TLS, notably extension of a mismatched primer terminus created by incorporation opposite a lesion                                                                                                                                                                                                                       |
| Rev7                 | REV7              | Small subunit of pol $\zeta$ (Nelson et al., 1996b); function unclear but probably regulatory; mediates binding to Rev1 (Murakumo et al., 2001)                                                                                                                                                                                                                                                                                                                                  |
| Rad30                | Pol $\eta$ , Polt | Y-family TLS polymerase. Pol $\eta$ (also known as RAD30A in vertebrates) is important for error-free bypass of UV-induced cyclobutane pyrimidine dimers (Johnson et al., 1999; Masutani et al., 1999)<br>A second Rad30 homologue (RAD30B or Polt) is present in most, but not all, vertebrates; its restrictive active site makes it extremely error-prone on template deoxythymidine (dT), but helps in the accurate replication of 8-oxoguanine (Vaisman and Woodgate, 2001) |
| –                    | Polk              | Y-family polymerase; not conserved in budding yeast but related to <i>E. coli</i> DNA polymerase IV (dinB). Mediates efficient bypass of abasic sites and bulky dG adducts such as benzo[a]pyrene diol-epoxide (BPDE) but with a propensity for –1 frameshifts (Ohashi et al., 2000)                                                                                                                                                                                             |
| Srs2                 | ?                 | Antirecombinogenic helicase that can displace Rad51 filaments; a direct vertebrate homologue is not obvious, but a number of vertebrate helicases have been shown to perform similar antirecombinogenic functions, including RECQL5 (Hu et al., 2007), RTEL (Barber et al., 2008) and PARI (Moldovan et al., 2011)                                                                                                                                                               |

**Box 1. Ubiquitylation**

Ubiquitin is a 76-amino-acid protein that can be covalently attached to accessible lysine residues on other proteins (Pickart, 2001). It can also be attached to itself to form chains through any of its seven lysine residues or its N-terminus to form linear chains. Ubiquitin is produced from a number of loci in yeast and human cells both as linear multimers and as fusions with ribosomal proteins. Ubiquitin monomers are produced by cleavage with ubiquitin C-terminal hydrolases. Ubiquitin–protein conjugation begins with the activation of ubiquitin by the attachment of its C-terminal glycine residue to a sulfhydryl group in the E1 ubiquitin activating enzyme. The ubiquitin is then transferred to the active site of one of the 30–40 known E2 ubiquitin conjugating enzymes by a transthioesterification reaction. Finally, transfer of the ubiquitin to its target is mediated by an E3 ubiquitin ligase, of which there are several hundred in the mammalian genome. E3 ligases fall into two groups, those containing a HECT domain and those containing a RING domain (Pickart, 2001). The principal E3 ligases involved in damage tolerance all fall into the latter category, and they play a crucial role in substrate recognition and assisting the transfer of the ubiquitin directly from the E2. Ubiquitylation has many diverse consequences for protein function. It is best known for its role in promoting protein degradation by the proteasome (through formation of K48-linked chains), but it can also be used to alter protein–protein interactions by interfering with existing binding interfaces or creating new binding surfaces, thereby promoting dynamic changes in protein complex formation (Grabbe et al., 2011; Welchman et al., 2005). However, the precise role played by ubiquitylation in many aspects of the DNA damage response, including DNA damage tolerance, remains poorly understood, particularly the role of the different topologies of ubiquitin chain (Ulrich and Walden, 2010).

These mechanisms are broadly conserved in vertebrates. PCNA is monoubiquitylated by RAD18 in response to DNA damage, and this step is important for the recruitment of translesion polymerases (Bienko et al., 2005; Kannouche et al., 2004). However, there is good evidence that PCNA ubiquitylation can also be mediated by activities other than RAD18 (Simpson et al., 2006; Terai et al., 2010; Zhang et al., 2008), including one of the vertebrate homologues of Rad5, helicase-like transcription factor (HLTF) (Lin et al., 2011). Vertebrate PCNA is also polyubiquitylated (Chiu et al., 2006), which is, in part, mediated by the Rad5 homologues, SHPRH (for SNF2, histone-linker, PHD and RING finger domain-containing helicase) and HLTF (Motegi et al., 2008; Motegi et al., 2006; Unk et al., 2008; Unk et al., 2006). However, the loss of SHPRH and HLTF appears to result in only rather subtle effects on damage tolerance in mice (Hendel et al., 2011; Krijger et al., 2011a). It is currently not clear whether this means that PCNA polyubiquitination is less important in vertebrate lesion bypass than it is in yeast or that other mechanisms, such as homologous recombination, can efficiently substitute.

K164, and the nearby K127, of PCNA can also be modified by conjugation of the ubiquitin-related protein SUMO (Hoege et al., 2002; Stelter and Ulrich, 2003). In budding yeast, PCNA SUMOylation acts to inhibit classical homologous recombination by recruiting the helicase Srs2, which is able to displace the recombinase Rad51 from DNA, allowing Rad18-dependent template switching to proceed (Papouli et al., 2005; Pfander et al., 2005). However, although PCNA SUMOylation has been observed in *S. pombe* (Frampton et al., 2006) and a number of vertebrate species (Arakawa et al., 2006; Leach and Michael, 2005), the conservation of PCNA SUMOylation as a means of regulating recombination is unclear.

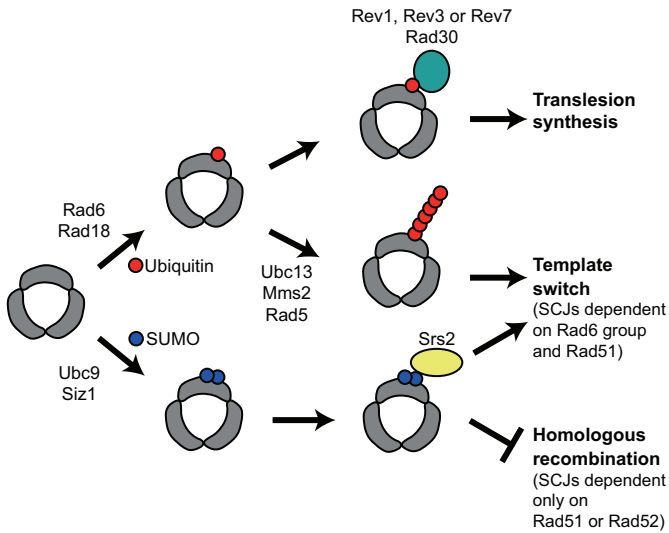

**Fig. 2. The PCNA switchboard in *S. cerevisiae*: regulation of competition between bypass pathways.** The DNA sliding clamp PCNA is a trimer, but for clarity only one subunit is shown as being modified. In practice, the PCNA trimer could have three different modifications simultaneously, either the same modification on all three subunits or any combination. PCNA can be modified at K164 with either ubiquitin, which is added by Rad6 and Rad18, or by SUMO, which is added by Ubc9 (the SUMO E2) and Siz1 (a SUMO E3 ligase) (Ulrich, 2009). Monoubiquitin facilitates the recruitment of the TLS polymerases to PCNA through interaction with the ubiquitin-binding domains found in Rev1 and Rad30 (*pol $\eta$* ) and hence promotes TLS (Bienko et al., 2005). Alternatively extension of the monoubiquitin with a K63-linked chain promotes template switching by a poorly understood mechanism (Hoegel et al., 2002). SUMOylation of PCNA at K164 in *S. cerevisiae*, recruits the antirecombinogenic helicase Srs2 that displaces Rad51 from single-stranded DNA and prevents the initiation of classical recombination (Papouli et al., 2005; Pfander et al., 2005). SCJ, sister chromatid junction.

### Competition

The classical model of lesion bypass (Fig. 1) envisages a series of pathways competing to process a lesion with post-translational modifications of PCNA regulating this competition (Fig. 2). The sequential action of RAD6 and RAD18 to monoubiquitylate PCNA, before ubiquitin chain extension by UBC13, MMS2 and RAD5 (Hoegel et al., 2002; Parker and Ulrich, 2009), provides a common intermediate, monoubiquitylated PCNA, that allows the decision between TLS and template switching to be made. Thus, either monoubiquitylated PCNA recruits a TLS polymerase, or it becomes polyubiquitylated and promotes template switching. However, as discussed below, in vertebrates, TLS DNA polymerases can be recruited independently of PCNA ubiquitylation (Hendel et al., 2011; Szüts et al., 2008) and thus the simple model of a genome-wide competition between bypass pathways that is regulated by PCNA modification becomes inadequate. Instead, the notion of competition between pathways needs to be qualified by the context in which lesion bypass is taking place. I now consider three examples of such context and explore how context might influence pathway competition.

### Timing of lesion bypass

The first way in which bypass events can be distinguished is by when they take place relative to the passage of the replication fork. There has been a long debate over this issue. Early models envisaged the formation of post-replicative gaps opposite DNA

lesions that are subsequently sealed (Rupp and Howard-Flanders, 1968; Rupp et al., 1971). However, alternative models for bypass that takes place at the fork thereby maintaining fork progression were also proposed (Higgins et al., 1976). These ideas gained further ground with evidence for a recombination mechanism in *Escherichia coli* that did not depend on daughter strand gaps but that could be used to repair forks stalled by UV damage (Courcelle et al., 1997). By the time the catalytic activity of the TLS polymerases had been identified (Woodgate, 1999), most models proposed envisaged bypass taking place at the fork. So, what is the evidence that distinct mechanisms do indeed operate at forks and at gaps?

Evidence to suggest that bypass at the fork and at post-replicative gaps could be distinguished genetically initially came from work in the avian cell line DT40 (Edmunds et al., 2008). In DT40 cells, PCNA ubiquitylation does not have the same central role in the control of TLS as it does in yeast, as double mutants lacking both PCNA ubiquitylation and either REV1 or Polk, are more sensitive to DNA damage than either of the single mutants (Arakawa et al., 2006; Edmunds et al., 2008; Okada et al., 2002; Ross et al., 2005). PCNA ubiquitylation and REV1 also have independent roles in mutagenesis in DT40 cells (Arakawa et al., 2006; Szüts et al., 2008). We proposed an explanation for these observations by suggesting that PCNA ubiquitylation and REV1 defined the temporally distinct pathways of bypass at the fork and at gaps behind the fork (Edmunds et al., 2008). We suggested that at the fork TLS proteins could be recruited independently of PCNA ubiquitylation by the C-terminal domains of REV1, which binds both PCNA and the other TLS polymerases (Guo et al., 2003; Ohashi et al., 2004; Ross et al., 2005; Tissier et al., 2004). A similar division of labour might also exist in mammalian cells. A REV1-dependent mode of TLS is seen at the fork (Jansen et al., 2009) and PCNA ubiquitylation, which has been proposed to largely control post-replicative gap filling (Niimi et al., 2008), has recently been shown to be unessential for TLS (Hendel et al., 2011; Krijger et al., 2011b). This suggests that REV1-dependent TLS might well be able to operate independently of PCNA ubiquitylation. However, in mice REV1 also plays a clear role in post-replicative gap filling (Jansen et al., 2009), indicating that REV1 could have both PCNA-ubiquitylation-dependent and -independent roles.

### Location of the lesion on the leading versus lagging strand

The location of a lesion on the leading or lagging strand template might also have a significant influence on how it is bypassed. The formation of post-replicative gaps will be more likely on the lagging strand owing to the inherently discontinuous nature of lagging strand replication. There is also some emerging genetic evidence of distinct bias in pathway usage at leading and lagging strand blocks. In the case of TLS, REV1 might be particularly important in replicating lesions and structures present on the leading strand template (Sale et al., 2009; Sarkies et al., 2010). Likewise, the role played by Rad5 in template switching in yeast has been proposed to be strand-specific, with Rad5 required for processing blocked leading strands, and Rad52-dependent recombination operating at blocked lagging strands (Gangavarapu et al., 2007).

### The nature of the lesion itself

The chemical and structural nature of the lesion is frequently an important determinant of the mechanism employed to repair it. For

instance the 8-oxoguanine lesion mentioned above can be specifically recognised and excised by the DNA glycosylase OGG1 (van der Kemp et al., 1996). Such selectivity is also apparent in TLS, with particular polymerases, or combinations of polymerase, being deployed at specific lesions (Shachar et al., 2009). For example, UV-induced cyclobutane pyrimidine dimers appear to be efficiently, and fairly specifically, replicated by DNA polymerase  $\eta$  (Johnson et al., 1999; Masutani et al., 1999). However, it remains unclear to what extent the polymerase selection exerted by a lesion is mediated by specific protein–protein or protein–DNA interactions and to what extent it is simply stochastic. An interesting further example of specialisation for different lesions has recently been documented in the template-switching pathway. The two vertebrate Rad5 homologues, SHPRH and HLTF, are differentially required for bypassing DNA damage that results from either UV, which requires HLTF, or the DNA-adding agent methylmethane sulphonate, which requires SHPRH (Lin et al., 2011).

These examples illustrate that consideration of the context of a lesion is important for interpreting the potential competition between alternative pathways that could replicate it. In the next section, I consider how recent evidence has led to the distinction between the classically defined pathways becoming increasingly blurred.

### Collaboration

As experimental techniques to examine the intermediates and outcomes of DNA lesion bypass reactions have advanced, it has become clear that the rather static view of the bypass pathways provided by classical genetics is too limited. In this section, I will examine the evidence for crosstalk between the classical bypass pathways (Fig. 3A).

### Crosstalk between classical homologous recombination and template switching

Many models of template switching resemble classical homologous recombination (Fig. 1), and the involvement of recombination proteins in template switching was anticipated by some of the earliest genetic analyses (reviewed in Broomfield et al., 2001). It has become increasingly clear that this mechanistic resemblance is more than superficial. Recent evidence from experiments using two-dimensional electrophoresis to analyse the Rad18-dependent template switch reaction has shown that the formation of key intermediates also depends on core recombination proteins, notably Rad51 (Branzei et al., 2008; Minca and Kowalski, 2010; Vanoli et al., 2010). Yeast cells deficient in the RecQ family helicase Sgs1 accumulate recombination structures, or X-molecules, during normal growth and more so following treatment with DNA-damaging agents such as methylmethane sulphonate (Liberi et al., 2005). Although the formation of these structures depends on the recombinase Rad51 (Liberi et al., 2005), it also requires Rad18 and Rad5 when PCNA can be SUMOylated, but not in the absence of PCNA SUMOylation (Branzei et al., 2008). This suggests that Rad18 and Rad5 are only needed to promote bypass in certain contexts, which are possibly defined by the presence of SUMOylated PCNA.

As well as RAD51 being required for the formation of RAD18-dependent template switch intermediates, RAD18 also appears to modulate classical RAD51-dependent recombination, notably the frequency at which crossovers are formed (Simpson et al., 2006;

Szűts et al., 2006). The involvement of RAD18 in homologous recombination appears to be mediated by its recruitment to DSBs through its zinc finger domain, which binds break-associated polyubiquitin chains (Huang et al., 2009). In this context, RAD18 is proposed to act as an adaptor protein, independently of its ubiquitin ligase activity, bridging break-induced ubiquitylation with the recruitment of the recombination mediator protein RAD51C (Huang et al., 2009). The extent to which Rad18 is directly involved in homologous recombination in yeast is less clear. However, Rad18-deficient *S. cerevisiae* exhibit sensitivity to ionising radiation that is independent of K164 of PCNA (Chen et al., 2005) which supports the possibility of a role for Rad18 in processing DSBs that is independent of PCNA ubiquitylation. In yeast, Rad5 has also been implicated in DSB repair (Chen et al., 2005), again a role that is independent of its ubiquitin ligase function. Furthermore, there is evidence that both the fission yeast (*S. pombe*) and plant (*Arabidopsis thaliana*) homologues of Rad5 are also involved in recombination (Chen et al., 2008; Doe et al., 1993). However, it is not clear that this putative role for Rad5 in recombination is maintained in the vertebrate Rad5 homologues SHPRH and HLTF (Unk et al., 2010).

### Crosstalk between template switch and TLS

The original screen for yeast mutants that exhibit impaired UV-induced mutagenesis identified the *rev2* mutant (Lemontt, 1971a), together with *rev1* and *rev3*, which subsequently were shown to be TLS polymerases (Nelson et al., 1996a; Nelson et al., 1996b). *rev2*, it turns out, is allelic with *rad5* (Game and Cox, 1971). Although Rad5 is now best known as a key factor in the ‘error-free’ branch of the Rad6 post-replication repair pathway (Johnson et al., 1992), Lemontt had suggested that Rev1 and Rev2 (Rad5) act in parallel pathways that both generate a common intermediate that is processed by Rev3 to generate mutations (Lemontt, 1971b), clearly implicating Rev2 (Rad5) in TLS. However, subsequent results from analyses of the role of Rad5 in mutagenesis appeared to depend on the reporter allele used (Lawrence and Christensen, 1978). Recently, the ability to analyse the bypass of specific lesions at a known site in plasmids has allowed an unambiguous demonstration of the role of Rad5 in TLS in both *S. cerevisiae* (Pages et al., 2008; Zhang and Lawrence, 2005) and *S. pombe* (Coulon et al., 2010). Intriguingly, this role appears to be independent of Mms2 and Ubc13 in *S. cerevisiae* and, furthermore, does not require either the helicase or ubiquitin ligase activity of Rad5 (Pages et al., 2008), suggesting that Rad5 has a structural role. Supporting this hypothesis, Pagès et al. demonstrated a physical interaction between *S. cerevisiae* Rad5 and Rev1 (Pagès et al., 2008). However, in *S. pombe*, the role of the Rad5 homologue, Rad8, in TLS does require Mms2 and Ubc13, suggesting a different mode of action in this organism (Coulon et al., 2010). Moving further up the evolutionary scale to mammalian cells, recent evidence suggests that the Rad5 homologue HLTF can help suppress UV mutagenesis by enhancing PCNA ubiquitylation and the recruitment of pol $\eta$  (Lin et al., 2011). However, another recent study found that there is no impact on TLS in shuttled plasmids in murine cell lines where both the Rad5 homologues (SHPRH and HLTF) have been disrupted (Hendel et al., 2011). Thus, the evidence for a conservation of the role of Rad5 and its homologues in coordinating TLS is patchy and might, as seen

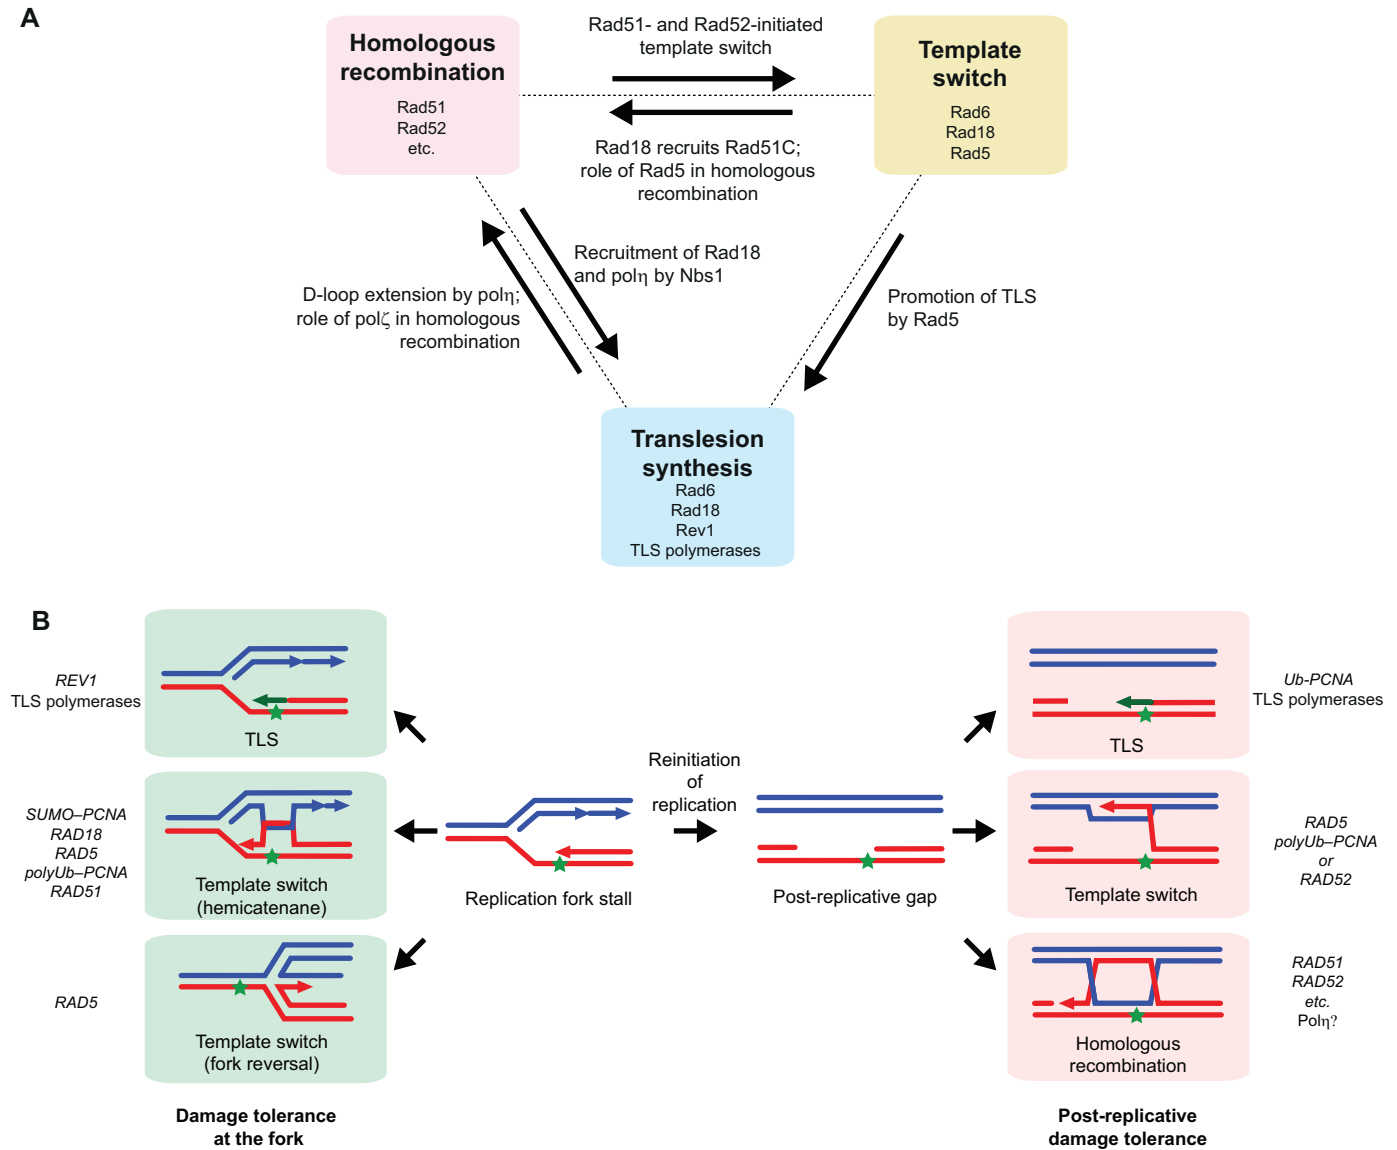

**Fig. 3. Collaboration between homologous, template switching and TLS.** (A) Summary of interactions between the three main classically defined pathways operating at stalled forks. Each is shown with the key proteins that represent the pathway within the coloured boxes. Genetic and mechanistic overlaps discussed in the main text are indicated next to the arrows. (B) A modular approach to replicating damaged DNA. Instead of simple genetic pathways, combinations of bypass proteins work together in discrete mechanistic ensembles, or ‘modules’. The green boxes represent mechanisms that act at the fork. The modules shown in pale pink act at post-replicative gaps that are formed remotely from the replicative helicase by reinitiation of DNA synthesis downstream of the block. Key genes acting in each ‘module’ are indicated alongside each box. The situations illustrated are necessarily limited and do not, for instance, cover the different requirements that might be dictated by contexts such as the lesion being on the leading or lagging strand or the nature of lesion itself (see main text for further discussion). polyUb, polyubiquitylation.

in the initial studies on the *rad5* yeast mutants, be highly dependent on context.

#### Crosstalk between TLS polymerases and recombination

A causal relationship between recombination and mutagenesis was established by examination of the repair of a chromosomal break that was induced by the HO endonuclease in *S. cerevisiae* (Strathern et al., 1995). This revealed that DNA synthesis associated with the recombinational repair of the break is error prone compared with that of normal replication. Subsequent work showed that these errors are dependent on Rev3, although Rev3 is not required for the recombination reaction itself (Holbeck and

Strathern, 1997). Both Rev3 and Rev1 are enriched at DSBs (Hirano and Sugimoto, 2006) and although their recruitment does not require PCNA ubiquitylation, it does depend on functional mitosis entry checkpoint protein 1 (MEC1), the yeast homologue of the ataxia telangiectasia and Rad3-related protein (ATR) checkpoint kinase. This role for Rev1 and Rev3 might be conserved as homologues of both proteins have been implicated in homologous recombination in vertebrates (Okada et al., 2005; Sharma et al., 2011; Sonoda et al., 2003).

Parallel investigations have suggested that *polη* has a role in extending Rad51-coated primer termini following the strand-invasion step of homologous recombination (McIlwraith et al.,

2005), an activity that could not be replaced by other specialised polymerases or pol $\delta$ . Furthermore, pol $\eta$  interacts with the Rad51 recombinase (McIlwraith et al., 2005). Supporting this model, Kawamoto and colleagues showed that pol $\eta$ -deficient DT40 cells display a decrease in gene conversions that are induced by DSBs or abasic sites at the immunoglobulin loci (Kawamoto et al., 2005). However, the impact of pol $\eta$  disruption is much less pronounced than that of core recombination factors, such as RAD54 (Bezzubova et al., 1997) or the Rad51 paralogues (Sale et al., 2001). Furthermore, neither pol $\eta$ -deficient DT40 cells nor cells derived from xeroderma pigmentosum variant (XP-V) patients, which carry a mutation in pol $\eta$  (Masutani et al., 1999), exhibit sensitivity to ionising radiation. In fact, XP-V-derived cells exhibit an increased UV-induced sister chromatid exchange (Cleaver et al., 1999) suggesting that failure to bypass UV-induced dimers results in an increased reliance on recombination-mediated resolution of arrested or collapsed forks. Thus, despite a considerable amount of evidence implicating TLS polymerases in recombination, further work is needed to clarify their mechanistic role, which again might be heavily dependent on the context of the recombination reaction.

In summary, recent studies have demonstrated that the boundaries between the classically defined genetic pathways of DNA damage bypass are more blurred than was initially appreciated. This should probably not come as a surprise given that the mechanisms of damage bypass have evolved to deal with a wide range of different problems rather than to fit neatly into simple pathways that would make our understanding more straightforward! However, these observations do mean that it becomes more important to consider bypass mechanisms on a fork-by-fork basis, rather than as a single process operating on an entire population of replication forks or, indeed, cells. Taking this idea to its logical conclusion would suggest that we could dispense with the idea of distinct pathways altogether and replace them with permutations of various factors in order to describe the process in terms of discrete mechanistic ensembles or ‘modules’ (Fig. 3B). To bypass simple replication blocks, a single ‘module’ might suffice, but the replication of more complex lesions or clusters of DNA damage would require the carefully coordinated deployment of a series of ‘modules’ and it is this coordination that I will consider in the final section.

### Coordination

The concept of a modular approach to processing blocked replication forks suggests that there is the need for coordination to ensure that factors are deployed in the correct order, particularly when dealing with complex lesions or clusters of damage in large genomes. To illustrate this idea, I will first consider how the Fanconi anaemia group of proteins coordinate the repair and replication of interstrand crosslinks in vertebrate cells. I will then explore the dual role of NBS1, which is deficient in the autosomal recessive chromosome instability disorder Nijmegen breakage syndrome (NBS), in both recombination and TLS (Yanagihara et al., 2011) and speculate how this might provide a platform for coordination of the two processes in some circumstances.

Interstrand crosslinks can arise from exposure to bifunctional DNA-adducting agents, such as the chemotherapeutic agents cisplatin and mitomycin C (Noll et al., 2006), and from endogenous sources such as naturally generated aldehydes (Langevin et al., 2011; Stone et al., 2008). They are highly

cytotoxic as they inhibit transcription and replication and, unlike lesions involving only one strand, cannot be replicated simply by the damage tolerance mechanisms discussed above. Thus, to avoid continued replication arrest or the formation of potentially lethal DSBs, vertebrate cells coordinately deploy a series of mechanisms to bypass these lesions (reviewed in Deans and West, 2011). Important aspects of the molecular mechanism of replication-dependent interstrand crosslink repair have recently been revealed by a series of elegant experiments in which the replication of a plasmid containing a site-specific crosslink has been monitored in *Xenopus* egg extracts (Knipscheer et al., 2009; Long et al., 2011; Raschle et al., 2008). A summary of the mechanism as it is presently understood is shown in Fig. 4.

How is this complex set of processes choreographed? There is now very strong evidence of a pivotal role for the multiprotein complex known to be mutated in the human genetic condition Fanconi anaemia (reviewed by Kee and D’Andrea, 2010). It has been known for many years that cells from Fanconi anaemia patients are particularly sensitive to interstrand crosslinking agents (Sasaki and Tonomura, 1973). Furthermore, genetic evidence has shown that the Fanconi anaemia pathway cooperates with both homologous recombination factors and the TLS polymerases REV1 and Pol $\zeta$  in conferring resistance to interstrand crosslinking agents (Niedzwiedz et al., 2004). At the centre of the Fanconi anaemia complex is a multisubunit ubiquitin ligase comprising at least eight components, which has two key targets in the related proteins Fanconi anaemia complementation group D2 (FANCD2) (Garcia-Higuera et al., 2001) and Fanconi anaemia complementation group I (FANCI) (Smogorzewska et al., 2007). Ubiquitylation of these proteins is significantly enhanced in response to fork arrest caused by an interstrand crosslink, a step necessary for effective interstrand crosslink repair (Knipscheer et al., 2009). Depleting FANCD2 from the *Xenopus* egg system results in failure of both the nucleolytic incisions and TLS across the lesion (Knipscheer et al., 2009), suggesting that the Fanconi anaemia proteins are involved in the early steps of this reaction. Intriguingly, although FANCD2 and FANCI appear to operate upstream of the recombinational repair of the incised strand, they are not needed for loading of RAD51, but instead for the initial nucleolytic incisions (Knipscheer et al., 2009; Long et al., 2011). How the Fanconi anaemia pathway promotes these incisions is still unclear, but it appears probable that it involves the scaffold protein SLX4, which has recently been shown to be mutated in the FANCP complementation group and, hence, is now also known as FANCP (Kim et al., 2011; Stoepker et al., 2011). SLX4 binds to a number of nucleases, including SLX1, MUS81–EME1 and ERCC1–XPF (Munoz et al., 2009), all of which have been implicated in interstrand crosslink repair, although complementation analysis of FANCP or SLX4-deficient fibroblasts indicates that the interaction with ERCC1–XPF, but not with SLX1, is important in mediating resistance to mitomycin C (Crossan et al., 2011). Thus, the replication of interstrand crosslinks in vertebrates requires the careful orchestration of endonucleolytic incision, REV1-dependent TLS and RAD51-dependent homologous recombination, with the Fanconi anaemia complex apparently acting as principal conductor to ensure these ‘modules’ are deployed in the correct order.

NBS1 is part of the MRE11 complex comprising NBS1, MRE11 and RAD50 (reviewed by Stracker and Petrini, 2011). This complex has a key role in the DNA damage response by

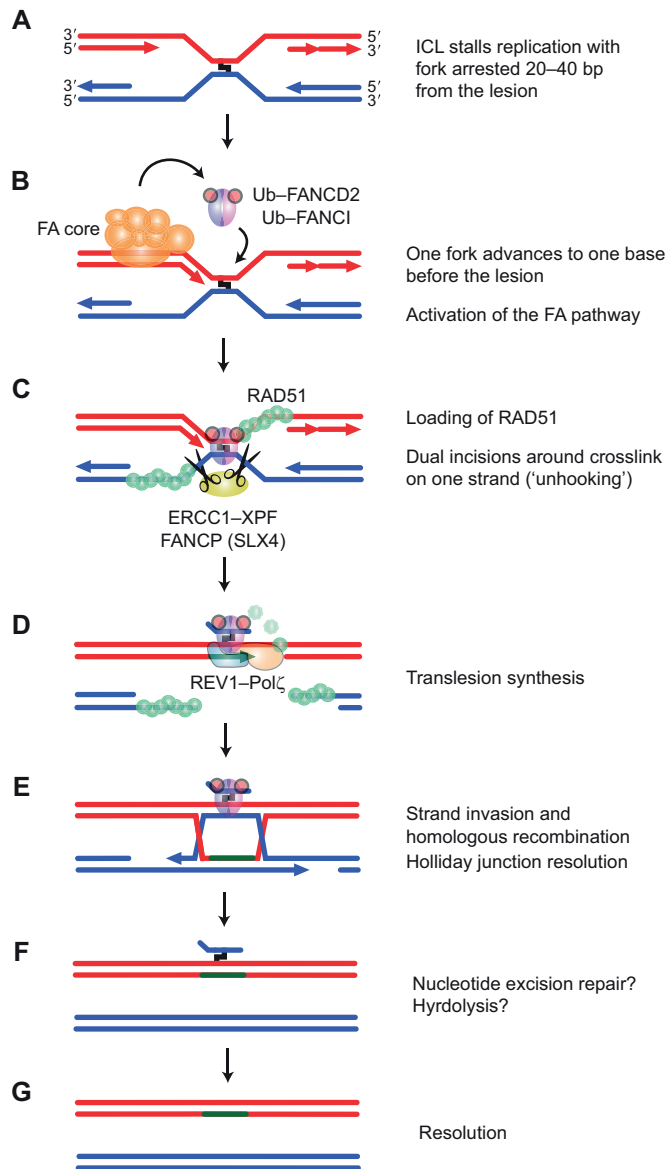

**Fig. 4. Model for replication-dependent interstrand crosslink repair in vertebrates and its coordination by the Fanconi anaemia proteins.** (A) In the system used by Walter and colleagues, a site-specific interstrand crosslink resides on a plasmid that it replicated in a *Xenopus* cell extract (Raschle et al., 2008). The replication forks move from the origin around the plasmid until they arrest ~20–40 nucleotides away from the crosslink (Raschle et al., 2008). (B) One of the forks then advances to one base before the crosslink. The Fanconi anaemia (FA) pathway recognises the lesion and is 'activated' by ubiquitylation (red circle) of FANCD2 and FANCI (pink and purple ovals) by the Fanconi anaemia core complex (orange cluster) (Knipscheer et al., 2009). (C) RAD51 (green circles) is loaded onto the single-stranded DNA around the crosslink prior to incisions being made either side of the lesion on one strand (Long et al., 2011). This step depends on the presence of FANCD2. The incision step is likely to be regulated by the nuclease complex ERCC1-XPF (Niedermhofer et al., 2004) coordinated by FANCP (SLX4) (yellow oval) (Crossan et al., 2011; Kim et al., 2011; Stoepker et al., 2011). (D) The now 'unhooked' crosslink can be bypassed by TLS, likely by REV1 with Pol $\zeta$  (blue and orange ovals) (Okada et al., 2005; Raschle et al., 2008). This step also requires FANCD2. (E) The remaining broken duplex can now be repaired by homologous recombination (Long et al., 2011). (F) The remainder of the crosslink is removed from the duplex either by nucleotide excision repair or hydrolysis. (G) Both duplexes are restored. The green line represents the tract of DNA synthesised by the TLS polymerases.

coordinating checkpoint activation through ataxia telangiectasia mutated (ATM), stabilisation of damaged replication forks and initiation of homologous recombination. However, a recent paper has shown that NBS1 is also important for the recruitment of RAD18 and for effective pol $\eta$ -dependent TLS (Yanagihara et al., 2011). NBS1 contains a domain in its C-terminus, alongside those responsible for its interaction with MRE11 and ATM, that interacts with RAD18. Although NBS1 and RAD6 compete for the same binding interface in the RAD18 molecule, the fact that RAD18 is a homodimer allows for a simultaneous interaction with both NBS1 and RAD6. Functionally, NBS1 is required for efficient deployment of pol $\eta$  and this is likely to explain the UV sensitivity of NBS1-deficient cells. Importantly, the UV sensitivity is not due to defective recombination because cells harbouring an NBS1 mutant that cannot bind MRE11 are sensitive to ionising radiation but not UV. Although the most straightforward explanation for this newly discovered role for NBS1 is that it is parallel and independent from its role in recombination, it is tempting to speculate that NBS1 provides a platform for the coordination of recombination and TLS. Such coordination might be particularly important for dealing with clustered DNA damage, such as that created by ionising radiation, which is characterised by a combination of DNA breaks and base lesions in close proximity. Similar to the replication of interstrand crosslinks, replication of clustered damage is likely to require the coordinate deployment of several of the 'modules' discussed above, and understanding this coordination will be an important area of future work.

### Conclusions and perspectives

We have moved from an apparently well-ordered view of lesion bypass laid out by the early genetic studies to a much more fluid model that has been revealed by recent experiments. The existence of multiple, intersecting mechanisms not only provides robustness to ensure safe bypass of lesions but also allows a modular approach to enable the bypass of complex lesions. A number of key issues remain to be resolved, some of which are highlighted below.

The first concerns the function of PCNA polyubiquitylation because the exact role of the K63-linked ubiquitin chains that form on PCNA during damage bypass remains a mystery. Do they simply provide a docking station for key reactants in the process, thereby locally concentrating them? Another possibility is that they have a role in maintaining the necessary apposition of the sister chromatids. Or do they have a more active role in 'remodelling' the stalled fork (Goldfless et al., 2006)? And if so, what is the nature of this process? The interaction of the bypass pathways with chromatin is another rather unexplored area. Recent evidence suggests that the timing of lesion bypass can directly affect the ability of cells to accurately propagate transcriptional states (Sarkies et al., 2012; Sarkies et al., 2010). Use of post-replicative gap-filling can result in DNA synthesis that is uncoupled from the supply of histones displaced ahead of the advancing fork, and these histones carry modifications that contribute to the specification of transcriptional states. This provides a potential mechanism by which a defect in DNA damage tolerance at the fork can give rise not only to genomic instability but also to widespread changes in gene expression, a feature of many cancers (Sarkies and Sale, 2012). It is also probable that the chromatin structure itself influences DNA damage tolerance pathways, and evidence for such interactions is



starting to emerge (Falbo et al., 2009). A final question is whether DNA damage tolerance pathways have potential as therapeutic targets. Recent data (Doles et al., 2010; Xie et al., 2010) provide some of the first clear evidence that targeted inhibition of DNA damage tolerance pathways holds promise as a chemotherapeutic approach in cancer. Answers to these questions will therefore not only further our understanding of the mechanism of DNA damage tolerance and its regulation but also, hopefully, provide new insights into how cancer arises and how it can be controlled.

### Acknowledgements

I would like to thank members of my lab for discussions and comments on the manuscript and Gerry Crossan, Juan Garaycochea and K. J. Patel for advice on the interstrand crosslink repair model.

### Funding

Work in my lab is funded by the Medical Research Council, Association for International Cancer Research and The Fanconi Anemia Research Fund.

### References

- Arakawa, H., Moldovan, G. L., Saribasak, H., Saribasak, N. N., Jentsch, S. and Buerstedde, J. M. (2006). A role for PCNA ubiquitination in immunoglobulin hypermutation. *PLoS Biol.* **4**, e366.
- Bailly, V., Lamb, J., Sung, P., Prakash, S. and Prakash, L. (1994). Specific complex formation between yeast RAD6 and RAD18 proteins: a potential mechanism for targeting RAD6 ubiquitin-conjugating activity to DNA damage sites. *Genes Dev.* **8**, 811-820.
- Bailly, V., Lauder, S., Prakash, S. and Prakash, L. (1997). Yeast DNA repair proteins Rad6 and Rad18 form a heterodimer that has ubiquitin conjugating, DNA binding, and ATP hydrolytic activities. *J. Biol. Chem.* **272**, 23360-23365.
- Barber, L. J., Youds, J. L., Ward, J. D., McIlwraith, M. J., O'Neil, N. J., Petalcorin, M. I., Martin, J. S., Collis, S. J., Cantor, S. B., Auclair, M. et al. (2008). RTEL1 maintains genomic stability by suppressing homologous recombination. *Cell* **135**, 261-271.
- Beard, W. A., Shock, D. D., Vande Berg, B. J. and Wilson, S. H. (2002). Efficiency of correct nucleotide insertion governs DNA polymerase fidelity. *J. Biol. Chem.* **277**, 47393-47398.
- Bezzubova, O., Silbergleit, A., Yamaguchi-Iwai, Y., Takeda, S. and Buerstedde, J. M. (1997). Reduced X-ray resistance and homologous recombination frequencies in a RAD54<sup>-/-</sup> mutant of the chicken DT40 cell line. *Cell* **89**, 185-193.
- Bienko, M., Green, C., Crosetto, N., Rudolf, F., Zapart, G., Coull, B., Kannoche, P., Wider, G., Peter, M., Lehmann, A. et al. (2005). Ubiquitin-binding domains in Y-family polymerases regulate translesion synthesis. *Science* **310**, 1821-1924.
- Blastyak, A., Pinter, L., Unk, I., Prakash, L., Prakash, S. and Haracska, L. (2007). Yeast Rad5 protein required for postreplication repair has a DNA helicase activity specific for replication fork regression. *Mol. Cell* **28**, 167-175.
- Branzei, D. (2011). Ubiquitin family modifications and template switching. *FEBS Lett.* **585**, 2810-2817.
- Branzei, D. and Foiani, M. (2010). Maintaining genome stability at the replication fork. *Nat. Rev. Mol. Cell Biol.* **11**, 208-219.
- Branzei, D., Vanoli, F. and Foiani, M. (2008). SUMOylation regulates Rad18-mediated template switch. *Nature* **456**, 915-920.
- Broomfield, S., Hryciw, T. and Xiao, W. (2001). DNA postreplication repair and mutagenesis in *Saccharomyces cerevisiae*. *Mutat. Res.* **486**, 167-184.
- Chen, I. P., Mannuss, A., Orel, N., Heitzeberg, F. and Puchta, H. (2008). A homolog of ScRAD5 is involved in DNA repair and homologous recombination in *Arabidopsis*. *Plant Physiol.* **146**, 1786-1796.
- Chen, S., Davies, A. A., Sagan, D. and Ulrich, H. D. (2005). The RING finger ATPase Rad5p of *Saccharomyces cerevisiae* contributes to DNA double-strand break repair in a ubiquitin-independent manner. *Nucleic Acids Res.* **33**, 5878-5886.
- Chiu, R. K., Brun, J., Ramaekers, C., Theys, J., Weng, L., Lambin, P., Gray, D. A. and Wouters, B. G. (2006). Lysine 63-polyubiquitination guards against translesion synthesis-induced mutations. *PLoS Genet.* **2**, e116.
- Cleaver, J. E., Afzal, V., Feeney, L., McDowell, M., Sadinski, W., Volpe, J. P., Busch, D. B., Coleman, D. M., Ziffer, D. W., Yu, Y. et al. (1999). Increased ultraviolet sensitivity and chromosomal instability related to P53 function in the xeroderma pigmentosum variant. *Cancer Res.* **59**, 1102-1108.
- Coulon, S., Ramasubramanian, S., Alies, C., Philippin, G., Lehmann, A. and Fuchs, R. P. (2010). Rad8Rad5/Mms2-Ubc13 ubiquitin ligase complex controls translesion synthesis in fission yeast. *EMBO J.* **29**, 2048-2058.
- Courcelle, J., Carswell-Crumpton, C. and Hanawalt, P. (1997). recF and recR are required for the resumption of replication at DNA replication forks in *Escherichia coli*. *Proc. Natl. Acad. Sci. USA* **94**, 3714-3719.
- Courcelle, J., Donaldson, J. R., Chow, K. H. and Courcelle, C. T. (2003). DNA damage-induced replication fork regression and processing in *Escherichia coli*. *Science* **299**, 1064-1067.
- Crossan, G. P., van der Weyden, L., Rosado, I. V., Langevin, F., Gaillard, P. H., McIntyre, R. E., Gallagher, F., Kettunen, M. I., Lewis, D. Y., Brindle, K. et al. (2011). Disruption of mouse Slx4, a regulator of structure-specific nucleases, phenocopies Fanconi anemia. *Nat. Genet.* **43**, 147-152.
- Davies, A. A., Huttner, D., Daigaku, Y., Chen, S. and Ulrich, H. D. (2008). Activation of ubiquitin-dependent DNA damage bypass is mediated by replication protein a. *Mol. Cell* **29**, 625-636.
- Deans, A. J. and West, S. C. (2011). DNA interstrand crosslink repair and cancer. *Nat. Rev. Cancer* **11**, 467-480.
- Doe, C. L., Murray, J. M., Shayeghi, M., Hoskins, M., Lehmann, A. R., Carr, A. M. and Watts, F. Z. (1993). Cloning and characterisation of the Schizosaccharomyces pombe rad8 gene, a member of the SNF2 helicase family. *Nucleic Acids Res.* **21**, 5964-5971.
- Doles, J., Oliver, T. G., Cameron, E. R., Hsu, G., Jacks, T., Walker, G. C. and Hemann, M. T. (2010). Suppression of Rev3, the catalytic subunit of Pol{zeta}, sensitizes drug-resistant lung tumors to chemotherapy. *Proc. Natl. Acad. Sci. USA* **107**, 20786-20791.
- Edmunds, C. E., Simpson, L. J. and Sale, J. E. (2008). PCNA ubiquitination and REV1 define temporally distinct mechanisms for controlling translesion synthesis in the avian cell line DT40. *Mol. Cell* **30**, 519-529.
- Falbo, K. B., Alabert, C., Katou, Y., Wu, S., Han, J., Wehr, T., Xiao, J., He, X., Zhang, Z., Shi, Y. et al. (2009). Involvement of a chromatin remodeling complex in damage tolerance during DNA replication. *Nat. Struct. Mol. Biol.* **16**, 1167-1172.
- Frampton, J., Irmisch, A., Green, C. M., Neiss, A., Trickey, M., Ulrich, H. D., Furuya, K., Watts, F. Z., Carr, A. M. and Lehmann, A. R. (2006). Postreplication repair and PCNA modification in *Schizosaccharomyces pombe*. *Mol. Biol. Cell* **17**, 2976-2985.
- Friedberg, E. C., Walker, G. C., Siede, W., Wood, R. D., Schultz, R. A. and Ellenberger, T. (2006). *DNA Repair and Mutagenesis*. Washington DC: ASM Press.
- Game, J. C. and Cox, B. S. (1971). Allelism tests of mutants affecting sensitivity to radiation in yeast and a proposed nomenclature. *Mutat. Res.* **12**, 328-331.
- Gangavarapu, V., Haracska, L., Unk, I., Johnson, R., Prakash, S. and Prakash, L. (2006). Mms2-Ubc13-dependent and -independent roles of Rad5 ubiquitin ligase in postreplication repair and translesion DNA synthesis in *Saccharomyces cerevisiae*. *Mol. Cell Biol.* **26**, 7783-7790.
- Gangavarapu, V., Prakash, S. and Prakash, L. (2007). Requirement of RAD52 group genes for postreplication repair of UV-damaged DNA in *Saccharomyces cerevisiae*. *Mol. Cell Biol.* **27**, 7758-7764.
- Garcia-Higuera, I., Taniguchi, T., Ganesan, S., Meyn, M. S., Timmers, C., Hejna, J., Grompe, M. and D'Andrea, A. D. (2001). Interaction of the Fanconi anemia proteins and BRCA1 in a common pathway. *Mol. Cell* **7**, 249-262.
- Goldfless, S. J., Morag, A. S., Belisle, K. A., Sutura, V. A., Jr and Lovett, S. T. (2006). DNA repeat rearrangements mediated by DnaK-dependent replication fork repair. *Mol. Cell* **21**, 595-604.
- Grabbe, C., Husnjak, K. and Dikic, I. (2011). The spatial and temporal organization of ubiquitin networks. *Nat. Rev. Mol. Cell Biol.* **12**, 295-307.
- Guo, C., Fischhaber, P. L., Luk-Paszyc, M. J., Masuda, Y., Zhou, J., Kamiya, K., Kisker, C. and Friedberg, E. C. (2003). Mouse Rev1 protein interacts with multiple DNA polymerases involved in translesion DNA synthesis. *EMBO J.* **22**, 6621-6630.
- Haracska, L., Torres-Ramos, C., Johnson, R., Prakash, S. and Prakash, L. (2004). Opposing effects of ubiquitin conjugation and SUMO modification of PCNA on replicational bypass of DNA lesions in *Saccharomyces cerevisiae*. *Mol. Cell Biol.* **24**, 4267-4274.
- Hendel, A., Krijger, P. H., Diamant, N., Goren, Z., Langerak, P., Kim, J., Reissner, T., Lee, K. Y., Geacintov, N. E., Carell, T. et al. (2011). PCNA ubiquitination is important, but not essential for translesion DNA synthesis in mammalian cells. *PLoS Genet.* **7**, e1002262.
- Higgins, N. P., Kato, K. and Strauss, B. (1976). A model for replication repair in mammalian cells. *J. Mol. Biol.* **101**, 417-425.
- Hirano, Y. and Sugimoto, K. (2006). ATR homolog Mec1 controls association of DNA polymerase zeta-Rev1 complex with regions near a double-strand break. *Curr. Biol.* **16**, 586-590.
- Hoegge, C., Pfander, B., Moldovan, G. L., Pyrowolakis, G. and Jentsch, S. (2002). RAD6-dependent DNA repair is linked to modification of PCNA by ubiquitin and SUMO. *Nature* **419**, 135-141.
- Hofmann, R. M. and Pickart, C. M. (1999). Noncanonical MMS2-encoded ubiquitin-conjugating enzyme functions in assembly of novel polyubiquitin chains for DNA repair. *Cell* **96**, 645-653.
- Holbeck, S. L. and Strathern, J. N. (1997). A role for REV3 in mutagenesis during double-strand break repair in *Saccharomyces cerevisiae*. *Genetics* **147**, 1017-1024.
- Hu, Y., Raynard, S., Sehorn, M. G., Lu, X., Bussen, W., Zheng, L., Stark, J. M., Barnes, E. L., Chi, P., Janscak, P. et al. (2007). RECQL5/Recq15 helicase regulates homologous recombination and suppresses tumor formation via disruption of Rad51 presynaptic filaments. *Genes Dev.* **21**, 3073-3084.
- Huang, J., Huen, M., Kim, H., Leung, C., Glover, J., Yu, X. and Chen, J. (2009). RAD18 transmits DNA damage signalling to elicit homologous recombination repair. *Nat. Cell Biol.* **11**, 592-603.
- Huen, M. S., Grant, R., Manke, I., Minn, K., Yu, X., Yaffe, M. B. and Chen, J. (2007). RNF8 transduces the DNA-damage signal via histone ubiquitylation and checkpoint protein assembly. *Cell* **131**, 901-914.
- Jansen, J. G., Tsaalbi-Shtylik, A., Hendriks, G., Verspuj, J., Gali, H., Haracska, L. and de Wind, N. (2009). Mammalian polymerase zeta is essential for post-replication repair of UV-induced DNA lesions. *DNA Repair* **8**, 1444-1451.

- Jentsch, S., McGrath, J. P. and Varshavsky, A. (1987). The yeast DNA repair gene RAD6 encodes a ubiquitin-conjugating enzyme. *Nature* **329**, 131-134.
- Johnson, R. E., Henderson, S. T., Petes, T. D., Prakash, S., Bankmann, M. and Prakash, L. (1992). Saccharomyces cerevisiae RAD5-encoded DNA repair protein contains DNA helicase and zinc-binding sequence motifs and affects the stability of simple repetitive sequences in the genome. *Mol. Cell. Biol.* **12**, 3807-3818.
- Johnson, R. E., Prakash, S. and Prakash, L. (1999). Efficient bypass of a thymine-thymine dimer by yeast DNA polymerase. *Science* **283**, 1001-1004.
- Kannouche, P. L., Wing, J. and Lehmann, A. R. (2004). Interaction of human DNA polymerase eta with monoubiquitinated PCNA: a possible mechanism for the polymerase switch in response to DNA damage. *Mol. Cell* **14**, 491-500.
- Kawamoto, T., Araki, K., Sonoda, E., Yamashita, Y. M., Harada, K., Kikuchi, K., Masutani, C., Hanaoka, F., Nozaki, K., Hashimoto, N. et al. (2005). Dual roles for DNA polymerase eta in homologous DNA recombination and translesion DNA synthesis. *Mol. Cell* **20**, 793-799.
- Kee, Y. and D'Andrea, A. D. (2010). Expanded roles of the Fanconi anemia pathway in preserving genomic stability. *Genes Dev.* **24**, 1680-1694.
- Kim, Y., Lach, F. P., Desetty, R., Hanenberg, H., Auerbach, A. D. and Smogorzewska, A. (2011). Mutations of the SLX4 gene in Fanconi anemia. *Nat. Genet.* **43**, 142-146.
- Knipscheer, P., Raschle, M., Smogorzewska, A., Enou, M., Ho, T. V., Scharer, O. D., Elledge, S. J. and Walter, J. C. (2009). The Fanconi anemia pathway promotes replication-dependent DNA interstrand cross-link repair. *Science* **326**, 1698-1701.
- Krijger, P. H., Lee, K. Y., Wit, N., van den Berk, P. C., Wu, X., Roest, H. P., Maas, A., Ding, H., Hoeijmakers, J. H., Myung, K. et al. (2011a). HLTf and SHPRH are not essential for PCNA polyubiquitination, survival and somatic hypermutation: existence of an alternative E3 ligase. *DNA Repair* **10**, 438-444.
- Krijger, P. H., van den Berk, P. C., Wit, N., Langerak, P., Jansen, J. G., Reynaud, C. A., de Wind, N. and Jacobs, H. (2011b). PCNA ubiquitination-independent activation of polymerase eta during somatic hypermutation and DNA damage tolerance. *DNA Repair* **10**, 1051-1059.
- Langevin, F., Crossan, G. P., Rosado, I. V., Arends, M. J. and Patel, K. J. (2011). Fancd2 counteracts the toxic effects of naturally produced aldehydes in mice. *Nature* **475**, 53-58.
- Lawrence, C. W. and Christensen, R. B. (1978). Ultraviolet-induced reversion of cycl alleles in radiation sensitive strains of yeast. II. rev2 mutant strains. *Genetics* **90**, 213-226.
- Leach, C. A. and Michael, W. M. (2005). Ubiquitin/SUMO modification of PCNA promotes replication fork progression in *Xenopus laevis* egg extracts. *J. Cell Biol.* **171**, 947-954.
- Lehmann, A. (2000). Replication of UV-damaged DNA: new insights into links between DNA polymerases, mutagenesis and human disease. *Genes* **253**, 1-12.
- Lemontt, J. F. (1971a). Mutants of yeast defective in mutation induced by ultraviolet light. *Genetics* **68**, 21-33.
- Lemontt, J. F. (1971b). Pathways of ultraviolet mutability in *Saccharomyces cerevisiae*. I. Some properties of double mutants involving *uvs9* and *rev*. *Mutat. Res.* **13**, 311-317.
- Liberi, G., Maffioletti, G., Lucca, C., Chiolo, I., Baryshnikova, A., Cotta-Ramusino, C., Lopes, M., Pellicoli, A., Haber, J. and Foiani, M. (2005). Rad51-dependent DNA structures accumulate at damaged replication forks in *sgs1* mutants defective in the yeast ortholog of BLM RecQ helicase. *Genes Dev.* **19**, 339-350.
- Lin, J. R., Zeman, M. K., Chen, J. Y., Yee, M. C. and Cimprich, K. A. (2011). SHPRH and HLTf Act in a Damage-Specific Manner to Coordinate Different Forms of Postreplication Repair and Prevent Mutagenesis. *Mol. Cell* **42**, 237-249.
- Long, D. T., Raschle, M., Joukov, V. and Walter, J. C. (2011). Mechanism of RAD51-dependent DNA interstrand cross-link repair. *Science* **333**, 84-87.
- Masutani, C., Kusumoto, R., Yamada, A., Dohmae, N., Yokoi, M., Yuasa, M., Araki, M., Iwai, S., Takio, K. and Hanaoka, F. (1999). The XPV (xeroderma pigmentosum variant) gene encodes human DNA polymerase eta. *Nature* **399**, 700-704.
- McGlynn, P. and Lloyd, R. G. (2000). Modulation of RNA polymerase by (p)ppGpp reveals a RecG-dependent mechanism for replication fork progression. *Cell* **101**, 35-45.
- McIlwraith, M. J., Vaisman, A., Liu, Y., Fanning, E., Woodgate, R. and West, S. C. (2005). Human DNA polymerase eta promotes DNA synthesis from strand invasion intermediates of homologous recombination. *Mol. Cell* **20**, 783-792.
- Minca, E. C. and Kowalski, D. (2010). Multiple Rad5 activities mediate sister chromatid recombination to bypass DNA damage at stalled replication forks. *Mol. Cell* **38**, 649-661.
- Moldovan, G. L., Dejsuphong, D., Petalcorin, M. I., Hofmann, K., Takeda, S., Boulton, S. J. and D'Andrea, A. D. (2011). Inhibition of homologous recombination by the PCNA-interacting protein PARI. *Mol. Cell* **45**, 75-86.
- Motegi, A., Sood, R., Moinova, H., Markowitz, S. D., Liu, P. P. and Myung, K. (2006). Human SHPRH suppresses genomic instability through proliferating cell nuclear antigen polyubiquitination. *J. Cell Biol.* **175**, 703-708.
- Motegi, A., Liaw, H., Lee, K., Roest, H., Maas, A., Wu, X., Moinova, H., Markowitz, S., Ding, H., Hoeijmakers, J. et al. (2008). Polyubiquitination of proliferating cell nuclear antigen by HLTf and SHPRH prevents genomic instability from stalled replication forks. *Proc. Natl. Acad. Sci. USA* **105**, 12411-12416.
- Munoz, I. M., Hain, K., Declais, A. C., Gardiner, M., Toh, G. W., Sanchez-Pulido, L., Heuckmann, J. M., Toth, R., Macartney, T., Eppink, B. et al. (2009). Coordination of structure-specific nucleases by human SLX4/BTD12 is required for DNA repair. *Mol. Cell* **35**, 116-127.
- Murakumo, Y., Ogura, Y., Ishii, H., Numata, S., Ichihara, M., Croce, C. M., Fishel, R. and Takahashi, M. (2001). Interactions in the error-prone postreplication repair proteins hREV1, hREV3, and hREV7. *J. Biol. Chem.* **276**, 35644-35651.
- Nelson, J. R., Lawrence, C. W. and Hinkle, D. C. (1996a). Deoxycytidyl transferase activity of yeast REV1 protein. *Nature* **382**, 729-731.
- Nelson, J. R., Lawrence, C. W. and Hinkle, D. C. (1996b). Thymine-thymine dimer bypass by yeast DNA polymerase zeta. *Science* **272**, 1646-1649.
- Niedernhofer, L. J., Odijk, H., Budzowska, M., van Drunen, E., Maas, A., Theil, A. F., de Wit, J., Jaspers, N. G., Beverloo, H. B., Hoeijmakers, J. H. et al. (2004). The structure-specific endonuclease Ercc1-Xpf is required to resolve DNA interstrand cross-link-induced double-strand breaks. *Mol. Cell. Biol.* **24**, 5776-5787.
- Niedzwiedz, W., Mosedale, G., Johnson, M., Ong, C. Y., Pace, P. and Patel, K. J. (2004). The Fanconi anaemia gene FANCC promotes homologous recombination and error-prone DNA repair. *Mol. Cell* **15**, 607-620.
- Niimi, A., Brown, S., Sabbioneda, S., Kannouche, P. L., Scott, A., Yasui, A., Green, C. M. and Lehmann, A. R. (2008). Regulation of proliferating cell nuclear antigen ubiquitination in mammalian cells. *Proc. Natl. Acad. Sci. USA* **105**, 16125-16130.
- Noll, D. M., Mason, T. M. and Miller, P. S. (2006). Formation and repair of interstrand cross-links in DNA. *Chem. Rev.* **106**, 277-301.
- Ohashi, E., Beneken, K., Matsuda, T., Feaver, W. J., Gerlach, V. L., Friedberg, E. C., Ohmori, H. and Kunkel, T. A. (2000). Fidelity and processivity of DNA synthesis by DNA polymerase kappa, the product of the human DINB1 gene. *J. Biol. Chem.* **275**, 39678-39684.
- Ohashi, E., Murakumo, Y., Kanjo, N., Akagi, J., Masutani, C., Hanaoka, F. and Ohmori, H. (2004). Interaction of hREV1 with three human Y-family DNA polymerases. *Genes Cells* **9**, 523-531.
- Okada, T., Sonoda, E., Yamashita, Y. M., Koyoshi, S., Tateishi, S., Yamaizumi, M., Takata, M., Ogawa, O. and Takeda, S. (2002). Involvement of vertebrate polkappa in Rad18-independent postreplication repair of UV damage. *J. Biol. Chem.* **277**, 48690-48695.
- Okada, T., Sonoda, E., Yoshimura, M., Kawano, Y., Saya, H., Kohzaki, M. and Takeda, S. (2005). Multiple roles of vertebrate REV genes in DNA repair and recombination. *Mol. Cell. Biol.* **25**, 6103-6111.
- Pages, V., Bresson, A., Acharya, N., Prakash, S., Fuchs, R. and Prakash, L. (2008). Requirement of Rad5 for DNA polymerase zeta-dependent translesion synthesis in *Saccharomyces cerevisiae*. *Genetics* **180**, 73-82.
- Papouli, E., Chen, S., Davies, A. A., Huttner, D., Krejci, L., Sung, P. and Ulrich, H. D. (2005). Crosstalk between SUMO and ubiquitin on PCNA is mediated by recruitment of the helicase Srs2p. *Mol. Cell* **19**, 123-133.
- Parker, J. L. and Ulrich, H. D. (2009). Mechanistic analysis of PCNA polyubiquitylation by the ubiquitin protein ligases Rad18 and Rad5. *EMBO J.* **28**, 3657-3666.
- Pfander, B., Moldovan, G. L., Sacher, M., Hoegge, C. and Jentsch, S. (2005). SUMO-modified PCNA recruits Srs2 to prevent recombination during S phase. *Nature* **436**, 428-433.
- Pickart, C. M. (2001). Mechanisms underlying ubiquitination. *Annu. Rev. Biochem.* **70**, 503-533.
- Prakash, L. (1981). Characterization of postreplication repair in *Saccharomyces cerevisiae* and effects of *rad6*, *rad18*, *rev3* and *rad52* mutations. *Mol. Gen. Genet.* **184**, 471-478.
- Raschle, M., Knipscheer, P., Enou, M., Angelov, T., Sun, J., Griffith, J., Ellenberger, T., Scharer, O. and Walter, J. C. (2008). Mechanism of replication-coupled DNA interstrand crosslink repair. *Cell* **134**, 969-980.
- Ross, A. L., Simpson, L. J. and Sale, J. E. (2005). Vertebrate DNA damage tolerance requires the C-terminus but not BRCT or transferase domains of REV1. *Nucleic Acids Res.* **33**, 1280-1289.
- Rupp, W. D. and Howard-Flanders, P. (1968). Discontinuities in the DNA synthesized in an excision-defective strain of *Escherichia coli* following ultraviolet irradiation. *J. Mol. Biol.* **31**, 291-304.
- Rupp, W. D., Wilde, C. E., 3rd, Reno, D. L. and Howard-Flanders, P. (1971). Exchanges between DNA strands in ultraviolet-irradiated *Escherichia coli*. *J. Mol. Biol.* **61**, 25-44.
- Sale, J. E., Calandrini, D. M., Takata, M., Takeda, S. and Neuberger, M. S. (2001). Ablation of XRCC2/3 transforms immunoglobulin V gene conversion into somatic hypermutation. *Nature* **412**, 921-926.
- Sale, J. E., Batters, C., Edmunds, C. E., Phillips, L. G., Simpson, L. J. and Szuts, D. (2009). Timing matters: error-prone gap filling and translesion synthesis in immunoglobulin gene hypermutation. *Philos. Trans. R. Soc. Lond. B Biol. Sci.* **364**, 595-603.
- Sale, J. E., Lehmann, A. R. and Woodgate, R. (2012). Y-family DNA polymerases and their role in tolerance of cellular DNA damage. *Nat. Rev. Mol. Cell Biol.* **13**, 141-152.
- Sarkies, P. and Sale, J. E. (2012). Cellular epigenetic stability and cancer. *Trends Genet.* **28**, 118-127.
- Sarkies, P., Reams, C., Simpson, L. J. and Sale, J. E. (2010). Epigenetic instability due to defective replication of structured DNA. *Mol. Cell* **40**, 703-713.
- Sarkies, P., Murat, P., Phillips, L. G., Patel, K. J., Balasubramanian, S. and Sale, J. E. (2012). FANCI coordinates two pathways that maintain epigenetic stability at G-quadruplex DNA. *Nucleic Acids Res.* **40**, 1485-1498.
- Sasaki, M. S. and Tomomura, A. (1973). A high susceptibility of Fanconi's anemia to chromosome breakage by DNA cross-linking agents. *Cancer Res.* **33**, 1829-1836.
- Shachar, S., Ziv, O., Avkin, S., Adar, S., Wittschieben, J., Reissner, T., Chaney, S., Friedberg, E., Wang, Z., Carell, T. et al. (2009). Two-polymerase mechanisms

- dictate error-free and error-prone translesion DNA synthesis in mammals. *EMBO J.* **28**, 383-393.
- Sharma, S., Hicks, J. K., Chute, C. L., Brennan, J. R., Ahn, J. Y., Glover, T. W. and Canman, C. E.** (2011). REV1 and polymerase {zeta} facilitate homologous recombination repair. *Nucleic Acids Res.* **40**, 682-691.
- Simpson, L. J., Ross, A. L., Szuts, D., Alviani, C. A., Oestergaard, V. H., Patel, K. J. and Sale, J. E.** (2006). RAD18-independent ubiquitination of proliferating-cell nuclear antigen in the avian cell line DT40. *EMBO Rep.* **7**, 927-932.
- Smogorzewska, A., Matsuoka, S., Vinciguerra, P., McDonald, E. R., Hurov, K., Luo, J., Ballif, B., Gygi, S., Hofmann, K., D'Andrea, A. et al.** (2007). Identification of the FANCI protein, a monoubiquitinated FANCD2 paralog required for DNA repair. *Cell* **129**, 289-301.
- Sonoda, E., Okada, T., Zhao, G. Y., Tateishi, S., Araki, K., Yamaizumi, M., Yagi, T., Verkaik, N. S., van Gent, D. C., Takata, M. et al.** (2003). Multiple roles of Rev3, the catalytic subunit of polzeta in maintaining genome stability in vertebrates. *EMBO J.* **22**, 3188-3197.
- Stelzer, P. and Ulrich, H. D.** (2003). Control of spontaneous and damage-induced mutagenesis by SUMO and ubiquitin conjugation. *Nature* **425**, 188-191.
- Stoepker, C., Hain, K., Schuster, B., Hilhorst-Hofstee, Y., Rooimans, M. A., Steltenpool, J., Oostra, A. B., Eirich, K., Korthof, E. T., Nieuwint, A. W. et al.** (2011). SLX4, a coordinator of structure-specific endonucleases, is mutated in a new Fanconi anemia subtype. *Nat. Genet.* **43**, 138-141.
- Stone, M. P., Cho, Y. J., Huang, H., Kim, H. Y., Kozekov, I. D., Kozekova, A., Wang, H., Minko, I. G., Lloyd, R. S., Harris, T. M. et al.** (2008). Interstrand DNA cross-links induced by alpha, beta-unsaturated aldehydes derived from lipid peroxidation and environmental sources. *Acc. Chem. Res.* **41**, 793-804.
- Stracker, T. H. and Petrini, J. H.** (2011). The MRE11 complex: starting from the ends. *Nat. Rev. Mol. Cell Biol.* **12**, 90-103.
- Strathern, J. N., Shafer, B. K. and McGill, C. B.** (1995). DNA synthesis errors associated with double-strand-break repair. *Genetics* **140**, 965-972.
- Szűts, D., Simpson, L. J., Kabani, S., Yamazoe, M. and Sale, J. E.** (2006). Role for RAD18 in homologous recombination in DT40 cells. *Mol. Cell Biol.* **26**, 8032-8041.
- Szűts, D., Marcus, A. P., Himoto, M., Iwai, S. and Sale, J. E.** (2008). REV1 restrains DNA polymerase zeta to ensure frame fidelity during translesion synthesis of UV photoproducts in vivo. *Nucleic Acids Res.* **36**, 6767-6780.
- Terai, K., Abbas, T., Jazaeri, A. A. and Dutta, A.** (2010). CRL4(Cdt2) E3 ubiquitin ligase monoubiquitinates PCNA to promote translesion DNA synthesis. *Mol. Cell* **37**, 143-149.
- Tissier, A., Kannouche, P., Reck, M. P., Lehmann, A. R., Fuchs, R. P. and Cordonnier, A.** (2004). Co-localization in replication foci and interaction of human Y-family members, DNA polymerase poleta and REV1 protein. *DNA Repair (Amst.)* **3**, 1503-1514.
- Torres-Ramos, C. A., Yoder, B. L., Burgers, P. M., Prakash, S. and Prakash, L.** (1996). Requirement of proliferating cell nuclear antigen in RAD6-dependent postreplicative DNA repair. *Proc. Natl. Acad. Sci. USA* **93**, 9676-9681.
- Torres-Ramos, C. A., Prakash, S. and Prakash, L.** (1997). Requirement of yeast DNA polymerase delta in post-replicative repair of UV-damaged DNA. *J. Biol. Chem.* **272**, 25445-25448.
- Ulrich, H. D.** (2009). Regulating post-translational modifications of the eukaryotic replication clamp PCNA. *DNA Repair* **8**, 461-469.
- Ulrich, H. D. and Jentsch, S.** (2000). Two RING finger proteins mediate cooperation between ubiquitin-conjugating enzymes in DNA repair. *EMBO J.* **19**, 3388-3397.
- Ulrich, H. D. and Walden, H.** (2010). Ubiquitin signalling in DNA replication and repair. *Nat. Rev. Mol. Cell Biol.* **11**, 479-489.
- Unk, I., Hajdu, I., Fatyol, K., Szakal, B., Blastyak, A., Bermudez, V., Hurwitz, J., Prakash, L., Prakash, S. and Haracska, L.** (2006). Human SHPRH is a ubiquitin ligase for Mms2-Ubc13-dependent polyubiquitylation of proliferating cell nuclear antigen. *Proc. Natl. Acad. Sci. USA* **103**, 18107-18112.
- Unk, I., Hajdu, I., Fatyol, K., Hurwitz, J., Yoon, J. H., Prakash, L., Prakash, S. and Haracska, L.** (2008). Human HLTF functions as a ubiquitin ligase for proliferating cell nuclear antigen polyubiquitination. *Proc. Natl. Acad. Sci. USA* **105**, 3768-3773.
- Unk, I., Hajdu, I., Blastyak, A. and Haracska, L.** (2010). Role of yeast Rad5 and its human orthologs, HLTF and SHPRH in DNA damage tolerance. *DNA Repair (Amst.)* **9**, 257-267.
- Vaisman, A. and Woodgate, R.** (2001). Unique misinsertion specificity of poliota may decrease the mutagenic potential of deaminated cytosines. *EMBO J.* **20**, 6520-6529.
- van der Kemp, P. A., Thomas, D., Barbey, R., de Oliveira, R. and Boiteux, S.** (1996). Cloning and expression in *Escherichia coli* of the OGG1 gene of *Saccharomyces cerevisiae*, which codes for a DNA glycosylase that excises 7,8-dihydro-8-oxoguanine and 2,6-diamino-4-hydroxy-5-N-methylformamidopyrimidine. *Proc. Natl. Acad. Sci. USA* **93**, 5197-5202.
- Vanoli, F., Fumasoni, M., Szakal, B., Maloisel, L. and Branzei, D.** (2010). Replication and recombination factors contributing to recombination-dependent bypass of DNA lesions by template switch. *PLoS Genet.* **6**, e1001205.
- Watanabe, K., Tateishi, S., Kawasuji, M., Tsurimoto, T., Inoue, H. and Yamaizumi, M.** (2004). Rad18 guides poleta to replication stalling sites through physical interaction and PCNA monoubiquitination. *EMBO J.* **23**, 3886-2896.
- Welchman, R. L., Gordon, C. and Mayer, R. J.** (2005). Ubiquitin and ubiquitin-like proteins as multifunctional signals. *Nat. Rev. Mol. Cell Biol.* **6**, 599-609.
- Woodgate, R.** (1999). A plethora of lesion-replicating DNA polymerases. *Genes Dev.* **13**, 2191-2195.
- Xie, K., Doles, J., Hemann, M. T. and Walker, G. C.** (2010). Error-prone translesion synthesis mediates acquired chemoresistance. *Proc. Natl. Acad. Sci. USA* **107**, 20792-20797.
- Yanagihara, H., Kobayashi, J., Tateishi, S., Kato, A., Matsuura, S., Tauchi, H., Yamada, K., Takezawa, J., Sugawara, K., Masutani, C. et al.** (2011). NBS1 recruits RAD18 via a RAD6-like domain and regulates Pol eta-dependent translesion DNA synthesis. *Mol. Cell* **43**, 788-797.
- Yang, W.** (2003). Damage repair DNA polymerases Y. *Curr. Opin. Struct. Biol.* **13**, 23-30.
- Zhang, H. and Lawrence, C. W.** (2005). The error-free component of the RAD6/RAD18 DNA damage tolerance pathway of budding yeast employs sister-strand recombination. *Proc. Natl. Acad. Sci. USA* **102**, 15954-15959.
- Zhang, S., Chea, J., Meng, X., Zhou, Y., Lee, E. and Lee, M.** (2008). PCNA is ubiquitinated by RNF8. *Cell Cycle* **7**, 3399-3404.
